# Supplementary material for: Multiscale monsoon variability during the last two climatic cycles revealed by spectral signals in Chinese loess and speleothem records
Source: Copernicus journal article supplement (doi:10.5194/cp-11-1067-2015), 2015-08-25
Supplement: Supplementary file 1 [file cp-11-1067-2015-supplement.zip]

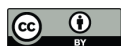

## *Supplement of*

# **Multiscale monsoon variability during the last two climatic cycles revealed by spectral signals in Chinese loess and speleothem records**

**Y. Li et al.**

*Correspondence to:* Y. Li (liying@ieecas.cn)

- cp-11-1067-2015-supplement-title-page.pdf
- supplementary materials
  - supplementary Code. 1.docx
  - supplementary Table. 1.xlsx
  - supplementary Table. 2.xlsx

The copyright of individual parts of the supplement might differ from the CC-BY 3.0 licence.
