# Supplementary material for: Multiscale monsoon variability during the last two climatic cycles revealed by spectral signals in Chinese loess and speleothem records
Source: Copernicus journal article supplement (doi:10.5194/cp-11-1067-2015), 2015-08-25
Supplement: Supplementary file 1 [file supplementary Code. 1.docx]

**m file:**

function plot_imf(x,t,imf)

s = size(imf);

k = s(1);

figure;

for j = 1:k-1

subplot(k,1,j)

plot(t,imf(j,:))

ylabel(['imf',int2str(j)])

end

subplot(k,1,1)

title('Empirical Mode Decomposition')

subplot(k,1,k)

plot(t,imf(k,:),'r')

ylabel('res.')

xlabel('t/s')

end

**code:**

clear all;
clc;

fs=100;
N=2571;
n=0:N-1;
t=n/fs;

x= [];
imf=emd(x);
figure,plot(t,x);xlabel('depth/m');ylabel('Amplitude');
nfft= 2^nextpow2(length(t));
ff=fs*(0:nfft/2-1)/nfft;
fftx=fft(x,nfft);
ps=fftx.*conj(fftx)/nfft;
figure;
subplot(211),plot(ff,abs(fftx(1:nfft/2))*2/nfft);ylabel('Amplitude');xlabel('Frequency');title('FFT Spectrum');
subplot(212),plot(ff,ps(1:nfft/2));ylabel('Spectral density');xlabel('Frequency');title('power spectrum');
plot_imf(x,t,imf);
