# Supplementary material for: Multiscale monsoon variability during the last two climatic cycles revealed by spectral signals in Chinese loess and speleothem records
Source: Copernicus journal article supplement (doi:10.5194/cp-11-1067-2015), 2015-08-25
Supplement: Supplementary file 2 [file cp-11-1067-2015-supplement.zip]

Archive with 5 entries (4 files):
- cp-11-1067-2015-supplement-title-page.pdf
- supplementary materials/
- supplementary materials/supplementary Table. 1.xlsx
- supplementary materials/supplementary Code. 1.docx
- supplementary materials/supplementary Table. 2.xlsx
