# Supplementary material for: Multiscale monsoon variability during the last two climatic cycles revealed by spectral signals in Chinese loess and speleothem records
Source: Copernicus journal article supplement (doi:10.5194/cp-11-1067-2015), 2015-08-25
Supplement: Supplementary file 2 [file cp-11-1067-2015-supplement.zip › supplementary materials/supplementary Table. 2.xlsx]

## Sheet: Sheet1
age (kyr)	d18O
0.46	-8.95
0.48	-8.62
0.49	-8.8
0.51	-8.81
0.53	-8.9
0.55	-9.05
0.57	-8.96
0.58	-8.9
0.6	-8.95
0.62	-9.11
0.64	-8.93
0.66	-9.04
0.67	-8.85
0.69	-8.94
0.71	-8.81
0.73	-8.94
0.75	-8.95
0.77	-8.96
0.78	-8.92
0.8	-9.09
0.82	-9.17
0.84	-9.03
0.86	-9.01
0.87	-8.86
0.89	-8.98
0.91	-9.15
0.93	-9.14
0.95	-9.13
0.96	-8.94
0.98	-9.26
1	-9.05
1.02	-9.14
1.04	-9.07
1.05	-9.07
1.07	-8.92
1.09	-9.03
1.11	-8.95
1.13	-8.96
1.14	-9.08
1.16	-9.04
1.18	-8.99
1.2	-9.33
1.22	-9.31
1.24	-9.07
1.25	-8.93
1.27	-8.76
1.29	-9.12
1.31	-9.13
1.33	-9.06
1.34	-9.07
1.36	-9.26
1.38	-9.03
1.4	-9
1.42	-8.88
1.43	-9.16
1.45	-9.12
1.47	-9
1.49	-8.95
1.51	-9.18
1.52	-8.96
1.54	-9.04
1.56	-9.04
1.58	-9.14
1.6	-9.06
1.61	-9.14
1.63	-9.11
1.65	-9.02
1.67	-8.81
1.69	-8.86
1.7	-8.91
1.72	-9.02
1.74	-9.1
1.76	-8.97
1.78	-8.97
1.8	-9.17
1.81	-9.07
1.83	-9.21
1.85	-9.31
1.87	-9.32
1.89	-9.36
1.9	-8.86
1.92	-9.14
1.94	-9.15
1.96	-9.35
1.98	-9.44
1.99	-9.19
2.01	-9.27
2.03	-9.46
2.05	-9.06
2.07	-9.27
2.08	-8.85
2.1	-9.05
2.12	-8.86
2.14	-8.99
2.16	-9.02
2.17	-8.95
2.19	-8.86
2.21	-9.13
2.23	-9.24
2.25	-9.39
2.27	-9.08
2.28	-9.17
2.3	-9.36
2.32	-9.04
2.34	-9.41
2.36	-9.27
2.37	-9.26
2.39	-9.28
2.41	-9.36
2.43	-9.32
2.45	-9.25
2.46	-9.28
2.48	-9.5
2.5	-9.31
2.52	-9.23
2.54	-9.84
2.55	-9.19
2.57	-9.57
2.59	-9.52
2.61	-9.56
2.63	-9.07
2.64	-9.25
2.66	-9.69
2.68	-9.4
2.7	-9.72
2.72	-9.01
2.74	-9.62
2.78	-9.9
2.8	-9.84
2.82	-9.89
2.84	-9.73
2.86	-10.15
2.9	-9.8
2.92	-9.83
2.94	-9.98
2.96	-9.93
2.98	-9.65
3.01	-9.72
3.03	-9.93
3.05	-10.28
3.07	-9.62
3.09	-9.45
3.11	-9.35
3.13	-9.49
3.15	-9.5
3.17	-9.45
3.19	-9.49
3.21	-9.33
3.23	-9.52
3.25	-9.54
3.27	-9.33
3.29	-9.51
3.31	-9.24
3.33	-9.51
3.35	-9.43
3.37	-9.44
3.39	-9.27
3.41	-9.42
3.43	-9.34
3.45	-9.69
3.46	-9.68
3.48	-9.65
3.5	-9.66
3.52	-9.67
3.54	-9.78
3.56	-9.73
3.58	-9.78
3.6	-9.88
3.61	-9.8
3.63	-9.82
3.65	-9.9
3.67	-9.85
3.69	-9.82
3.71	-9.79
3.73	-9.89
3.75	-9.79
3.76	-9.83
3.78	-9.74
3.8	-9.5
3.82	-9.66
3.84	-9.83
3.86	-9.98
3.88	-9.86
3.9	-9.8
3.91	-9.86
3.93	-9.61
3.95	-9.76
3.97	-9.9
3.99	-9.82
4.01	-9.71
4.03	-9.88
4.05	-9.85
4.06	-9.75
4.08	-9.8
4.1	-9.65
4.12	-9.91
4.14	-9.97
4.16	-9.61
4.18	-9.71
4.2	-9.56
4.23	-9.16
4.44	-10.18
4.65	-10.38
4.86	-10.48
4.94	-10.22
5.02	-10.48
5.11	-10.52
5.19	-10.35
5.28	-10.38
5.36	-10.47
5.45	-10.39
5.53	-10.42
5.61	-10.5
5.7	-10.37
5.78	-10.35
5.87	-10.41
5.95	-10.35
6.03	-10.55
6.12	-10.2
6.2	-10.39
6.29	-10.23
6.37	-10.34
6.46	-10.34
6.54	-10.49
6.62	-10.57
6.66	-10.32
6.7	-10.38
6.74	-10.32
6.77	-10.45
6.81	-10.42
6.85	-10.47
6.88	-10.79
6.92	-10.72
6.96	-10.61
6.99	-10.67
7.03	-10.38
7.07	-10.62
7.11	-10.6
7.14	-10.6
7.18	-10.51
7.22	-10.41
7.25	-10.6
7.29	-10.66
7.33	-10.63
7.37	-10.56
7.4	-10.59
7.44	-10.75
7.48	-10.67
7.51	-10.55
7.55	-10.44
7.59	-10.4
7.63	-10.44
7.66	-10.51
7.7	-10.53
7.74	-10.46
7.77	-10.46
7.81	-10.12
7.85	-10.21
7.89	-10.35
7.91	-10.7
7.93	-10.44
7.95	-10.25
7.97	-10.37
7.99	-10.29
8.01	-10.16
8.03	-10.22
8.05	-10.27
8.07	-10.46
8.09	-10.47
8.11	-10.65
8.14	-10.51
8.16	-10.35
8.18	-10.55
8.2	-10.34
8.22	-10.5
8.24	-10.58
8.26	-10.52
8.28	-10.47
8.31	-10.5
8.33	-10.41
8.35	-10.51
8.37	-10.22
8.39	-10.42
8.41	-10.58
8.43	-10.41
8.45	-10.59
8.48	-10.41
8.5	-10.3
8.52	-10.54
8.54	-10.49
8.55	-10.21
8.57	-10.3
8.58	-10.3
8.59	-10.22
8.6	-10.36
8.62	-10.38
8.63	-10.22
8.64	-10.63
8.66	-10.58
8.67	-10.37
8.68	-10.21
8.69	-10.5
8.71	-10.45
8.72	-10.66
8.73	-10.56
8.74	-10.64
8.76	-10.57
8.77	-10.54
8.78	-10.62
8.8	-10.64
8.81	-10.56
8.82	-10.49
8.83	-10.75
8.85	-10.83
8.87	-10.69
8.89	-10.46
8.92	-10.55
8.94	-10.45
8.97	-10.59
8.99	-10.59
9.01	-10.54
9.04	-10.45
9.06	-10.34
9.09	-10.66
9.11	-10.56
9.13	-10.61
9.16	-10.54
9.18	-10.53
9.2	-10.55
9.23	-10.67
9.25	-10.41
9.28	-10.45
9.3	-10.11
9.32	-10.44
9.34	-10.47
9.35	-10.33
9.37	-10.49
9.39	-10.42
9.41	-10.48
9.42	-10.4
9.44	-10.42
9.46	-10.54
9.48	-10.48
9.49	-10.45
9.51	-10.68
9.53	-10.31
9.55	-10.27
9.56	-10.47
9.58	-10.38
9.6	-10.3
9.62	-10.31
9.64	-10.35
9.65	-10.23
9.67	-10.38
9.69	-10.11
9.7	-10.23
9.72	-10.31
9.73	-10.42
9.74	-10.16
9.76	-10.48
9.77	-10.33
9.79	-10.48
9.8	-10.54
9.82	-10.49
9.83	-10.54
9.84	-10.41
9.86	-10.14
9.87	-10.19
9.89	-10.15
9.92	-10.37
9.94	-10.49
9.96	-10.48
9.98	-10.27
10	-10.47
10.02	-10.54
10.04	-10.54
10.07	-10.03
10.09	-10.14
10.11	-10.1
10.13	-9.95
10.15	-9.95
10.17	-10.14
10.2	-9.84
10.22	-10.15
10.24	-10.38
10.26	-10.21
10.29	-9.96
10.31	-10.23
10.33	-10.19
10.35	-10.16
10.38	-10.26
10.4	-10.05
10.42	-10
10.45	-10.01
10.47	-10.2
10.49	-10.16
10.51	-10.41
10.54	-10.09
10.56	-10.07
10.58	-9.95
10.61	-10.06
10.63	-10.06
10.65	-9.93
10.67	-9.65
10.7	-10.06
10.72	-9.94
10.74	-9.91
10.77	-9.87
10.79	-9.9
10.81	-9.9
10.83	-10.03
10.86	-9.86
10.88	-9.83
10.9	-9.64
10.93	-9.79
10.95	-9.75
10.97	-9.67
10.99	-9.63
11.02	-9.99
11.04	-9.68
11.06	-9.58
11.08	-9.82
11.11	-9.63
11.13	-9.58
11.15	-9.53
11.18	-9.4
11.2	-9.42
11.22	-9.28
11.24	-9.37
11.27	-9.42
11.37	-8.78
11.62	-8.68
11.86	-8.44
12.11	-8.48
12.36	-8.72
12.6	-9.06
12.85	-9.03
13.09	-9.16
13.34	-9.13
13.59	-9.45
13.61	-9.38
13.63	-9.1
13.65	-9.06
13.67	-8.92
13.69	-9.08
13.71	-9.07
13.73	-9.15
13.75	-8.79
13.77	-8.81
13.79	-8.84
13.81	-8.78
13.83	-8.87
13.85	-8.84
13.87	-8.66
13.89	-8.5
13.91	-8.38
13.93	-8.61
13.95	-8.43
13.97	-8.61
13.99	-8.51
14.01	-8.65
14.03	-8.67
14.05	-8.66
14.07	-8.39
14.09	-8.36
14.11	-8.37
14.13	-8.12
14.15	-8.2
14.17	-8.11
14.19	-8.01
14.21	-7.99
14.23	-7.95
14.25	-8.1
14.27	-8
14.29	-7.9
14.31	-7.79
14.33	-7.9
14.35	-8.06
14.37	-8.28
14.39	-8.02
14.41	-7.93
14.43	-7.91
14.45	-8.1
14.47	-7.73
14.49	-7.76
14.51	-7.78
14.53	-7.83
14.55	-7.69
14.57	-7.77
14.6	-7.6
14.62	-7.6
14.64	-7.56
14.66	-7.58
14.68	-7.43
14.7	-7.39
14.72	-7.17
14.74	-7.04
14.76	-7
14.78	-7.1
14.8	-6.93
14.82	-6.89
14.84	-6.86
14.86	-7.74
14.88	-6.76
14.9	-6.8
14.92	-6.7
14.94	-6.73
14.96	-6.59
14.98	-6.59
15	-6.67
15.02	-6.71
15.04	-6.63
15.06	-6.43
15.08	-6.56
15.1	-6.46
15.12	-6.75
15.14	-6.54
15.16	-6.49
15.18	-6.41
15.2	-6.49
15.26	-6.2
15.32	-6.39
15.38	-6.68
15.44	-6.44
15.5	-6.76
15.56	-6.44
15.61	-6.63
15.67	-6.75
15.73	-6.51
15.79	-6.67
15.85	-6.71
15.91	-6.74
15.97	-6.92
16.03	-6.82
16.09	-6.79
16.15	-7
16.2	-7.23
16.26	-7.24
16.32	-7.36
16.38	-7.33
16.44	-7.48
16.5	-7.6
16.56	-7.77
16.62	-7.55
16.68	-7.58
16.74	-7.68
16.79	-7.82
16.85	-8.05
16.91	-7.89
16.97	-8.09
17.03	-8.08
17.09	-8.19
17.15	-8.3
17.21	-8.45
17.27	-8.29
17.33	-8.54
17.38	-8.37
17.44	-8.71
17.5	-8.83
17.56	-8.73
17.62	-8.91
17.68	-9.03
17.74	-8.89
17.8	-8.85
17.86	-8.94
17.92	-8.94
17.98	-9.14
18.03	-8.93
18.09	-8.83
18.15	-8.75
18.21	-8.63
18.27	-8.78
18.33	-8.74
18.39	-8.69
18.45	-8.76
18.51	-8.8
18.57	-8.77
18.62	-8.76
18.68	-8.67
18.74	-8.66
18.8	-8.64
18.86	-8.71
18.92	-8.62
18.98	-8.72
19.04	-8.79
19.1	-8.63
19.16	-8.52
19.21	-8.74
19.211	-7.6792
19.264	-7.8764
19.317	-7.9344
19.37	-7.946
19.423	-7.9808
19.476	-7.8996
19.529	-7.714
19.582	-7.5052
19.635	-7.6096
19.688	-7.4588
19.741	-7.3428
19.794	-7.3892
19.847	-7.3892
19.9	-7.2732
19.953	-7.3312
20.006	-7.2036
20.059	-7.25
20.112	-7.0412
20.165	-7.2152
20.218	-7.1688
20.271	-7.2848
20.324	-7.4008
20.377	-7.2616
20.43	-7.1224
20.483	-7.0412
20.536	-7.134
20.589	-7.1456
20.642	-7.1456
20.695	-7.2616
20.748	-7.3312
20.801	-7.2268
20.854	-7.308
20.907	-7.2384
20.96	-7.3312
21.037	-7.4124
21.114	-7.3544
21.192	-7.1456
21.269	-7.192
21.346	-7.308
21.423	-6.9252
21.501	-6.9948
21.578	-7.0528
21.655	-7.076
21.732	-7.0876
21.81	-7.018
21.887	-7.076
21.964	-7.25
22.041	-7.3428
22.118	-7.0528
22.196	-7.0412
22.273	-7.076
22.36	-7.1688
22.446	-7.308
22.533	-7.2152
22.62	-7.1572
22.706	-7.1572
22.793	-7.0296
22.88	-7.2036
22.966	-7.1804
23.053	-7.2732
23.14	-7.2848
23.226	-7.4124
23.313	-7.5284
23.4	-7.4008
23.487	-7.2732
23.573	-7.2616
23.66	-7.0876
23.747	-6.902
23.833	-6.7048
23.92	-6.67
24.007	-6.4612
24.093	-6.2756
24.18	-5.9972
24.241	-6.0552
24.302	-6.3452
24.363	-6.322
24.424	-6.5076
24.485	-6.96
24.546	-7.3892
24.607	-7.8416
24.669	-7.9808
24.73	-8.0272
24.79	-7.8184
24.85	-7.5748
24.913	-7.5168
24.974	-7.5632
25.035	-7.5284
25.096	-7.2732
25.157	-7.2732
25.218	-7.308
25.279	-7.4356
25.34	-7.2732
25.401	-7.3544
25.462	-7.5168
25.523	-7.656
25.584	-7.4588
25.768	-7.25
25.829	-7.1572
25.883	-7.192
25.938	-7.2732
25.992	-7.366
26.046	-7.5168
26.101	-7.4704
26.155	-7.5864
26.21	-7.5632
26.264	-7.6444
26.318	-7.7372
26.373	-7.8184
26.427	-8.1664
26.482	-8.004
26.536	-7.9344
26.59	-7.8648
26.645	-7.7488
26.699	-7.83
26.754	-7.946
26.808	-8.352
26.862	-8.5608
26.917	-8.5028
26.971	-8.3404
27.026	-8.2244
27.08	-8.1316
27.152	-8.1084
27.296	-8.1664
27.439	-8.2824
27.583	-8.3056
27.726	-8.7696
27.87	-8.9784
28.014	-8.2708
28.157	-8.0852
28.301	-8.1548
28.445	-8.0504
28.588	-8.1084
28.732	-8.5956
28.876	-9.0016
29.019	-9.3496
29.163	-9.338
29.428	-9.918
29.694	-9.28
29.959	-8.6652
30.225	-7.714
30.49	-7.6444
30.7	-7.8068
30.91	-8.2012
31.12	-8.3288
31.33	-9.106
31.54	-8.8624
31.75	-8.8508
31.96	-8.8276
32.17	-8.4796
32.375	-8.6304
32.58	-9.6164
32.785	-9.9876
32.99	-8.3172
33.195	-8.6188
33.4	-8.7116
33.605	-9.1756
33.81	-9.3496
34.015	-8.468
34.22	-8.3868
34.425	-9.0364
34.63	-9.6164
34.82	-9.3264
35.009	-9.28
35.199	-9.338
35.388	-8.7116
35.578	-8.062
35.767	-8.41
35.957	-9.0016
36.146	-9.4772
36.336	-9.2568
36.525	-9.5816
36.715	-9.6164
36.905	-9.3612
37.094	-9.512
37.284	-9.6048
37.473	-8.5608
37.663	-8.3288
37.852	-8.9668
38.042	-8.4216
38.231	-7.7836
38.421	-7.5864
38.61	-7.2732
38.8	-7.1804
39.11	-7.9576
39.42	-7.7488
39.73	-8.7812
40.031	-8.5724
40.332	-8.3288
40.633	-8.5724
40.934	-8.6536
41.235	-9.1524
41.536	-9.1292
41.837	-8.8624
42.138	-7.8532
42.439	-8.1664
42.74	-8.99
42.964	-9.1408
43.189	-9.3496
43.413	-9.2684
43.637	-9.3612
43.861	-9.0248
44.086	-8.004
44.31	-7.888
44.424	-8.1084
44.537	-8.1896
44.651	-8.236
44.764	-9.222
44.878	-9.2336
44.991	-9.0016
45.105	-8.7232
45.218	-9.0248
45.332	-9.106
45.445	-9.0944
45.654	-9.5816
45.864	-9.7324
46.073	-9.4656
46.283	-9.3264
46.492	-9.6976
46.702	-9.1176
46.911	-9.1756
47.127	-9.1756
47.343	-9.338
47.558	-9.2336
47.774	-7.9228
47.99	-7.8068
48.183	-8.0852
48.375	-7.8416
48.568	-8.1896
48.761	-8.6188
48.954	-9.106
49.146	-9.3844
49.339	-9.7324
49.532	-8.9436
49.725	-9.2916
49.917	-9.2568
50.11	-9.0016
50.303	-9.57
50.496	-9.1524
50.688	-9.6048
50.881	-9.4308
51.074	-9.5816
51.266	-9.8948
51.459	-9.5468
51.652	-9.8252
51.845	-9.8252
52.037	-9.8716
52.23	-9.9412
52.423	-9.86
52.616	-9.802
52.808	-9.5352
53.001	-9.28
53.03	-10.1384
53.13	-10.0224
53.23	-10.1848
53.495	-9.5468
53.759	-9.7672
54.024	-9.454
54.156	-9.164
54.288	-9.3728
54.42	-9.3032
54.553	-9.164
54.685	-8.7464
54.817	-8.932
54.95	-8.9204
55.082	-8.7
55.214	-8.8044
55.346	-9.686
55.479	-9.802
55.611	-9.1408
55.743	-8.642
55.875	-9.1408
56.008	-9.222
56.14	-9.7672
56.238	-9.8832
56.336	-10.1036
56.434	-10.4516
56.532	-10.3472
56.63	-10.3704
56.728	-10.1384
56.826	-10.1036
56.924	-9.9876
57.022	-10.0224
57.12	-10.0688
57.199	-10.2892
57.278	-10.208
57.357	-9.9644
57.436	-10.1152
57.514	-10.2544
57.593	-9.8948
57.672	-10.0804
57.751	-10.2544
57.83	-10.1848
57.909	-10.1848
57.988	-10.6372
58.067	-9.976
58.146	-10.2196
58.224	-9.9876
58.303	-10.0804
58.382	-9.7788
58.461	-9.3728
58.54	-9.6744
58.619	-9.686
58.698	-8.6768
58.777	-8.7696
58.856	-9.3032
58.934	-9.454
59.013	-9.8832
59.092	-9.4424
59.171	-9.7672
59.25	-9.6744
59.329	-9.106
59.408	-8.9552
59.487	-9.28
59.566	-9.8136
59.644	-9.1988
59.723	-8.4448
59.802	-7.9692
59.881	-8.3288
59.96	-8.1548
60.314	-8.2476
60.669	-8.0504
61.023	-8.2012
61.378	-8.178
62.087	-8.4796
62.441	-8.5724
62.796	-8.2244
63.15	-8.2592
63.324	-8.3172
63.497	-8.4796
63.671	-8.5956
63.844	-8.4332
64.018	-8.3752
64.191	-8.3868
64.365	-8.874
64.538	-8.642
64.712	-8.4216
64.885	-8.5492
65.059	-8.2824
65.232	-8.1084
65.406	-7.888
65.579	-7.7024
65.753	-7.7024
65.926	-8.1316
66.1	-8.294
66.459	-7.9344
66.818	-7.8764
67.177	-7.9228
67.536	-8.294
67.895	-8.294
68.255	-8.178
68.614	-8.3984
68.973	-8.8856
69.332	-7.3312
69.691	-7.9112
70.05	-8.5956
70.129	-8.4332
70.207	-8.8508
70.286	-8.41
70.365	-8.642
70.444	-9.3844
70.522	-8.642
70.601	-8.8044
70.68	-9.1756
70.758	-8.9668
70.837	-9.57
70.916	-8.6884
70.995	-9.2104
71.073	-9.0132
71.152	-8.99
71.231	-8.7348
71.309	-8.9784
71.388	-8.932
71.467	-9.0132
71.545	-9.3496
71.624	-9.3728
71.703	-8.7928
71.782	-8.642
71.86	-8.932
71.939	-9.6164
72.018	-9.4308
72.096	-7.1108
72.175	-7.6444
72.254	-7.6328
72.333	-6.8092
72.411	-6.5888
72.49	-6.7512
72.537	-6.3336
72.584	-6.5192
72.631	-6.5424
72.679	-6.728
72.726	-7.7372
72.773	-8.3868
72.82	-9.0132
72.948	-8.7812
73.077	-8.7
73.205	-8.6884
73.334	-8.9204
73.462	-8.8624
73.591	-9.0944
73.719	-9.338
73.847	-8.8972
73.976	-8.8508
74.104	-8.5376
74.233	-7.946
74.361	-8.1896
74.49	-9.6396
74.618	-9.4772
74.747	-9.5584
74.875	-9.5004
75.003	-9.8136
75.132	-9.7092
75.26	-9.5236
75.389	-9.4656
75.517	-9.4192
75.646	-9.744
75.6	-9.62
75.7	-9.51
75.9	-9.41
76	-9.48
76.1	-9.1
76.2	-9.15
76.3	-9.05
76.5	-9.15
76.6	-8.4
76.7	-8.75
76.8	-8.62
76.9	-8.9
77.1	-9.52
77.1	-10.04
77.2	-10.16
77.3	-10.51
77.4	-10.47
77.5	-10.55
77.6	-10.41
77.65	-10.34
77.7	-10.47
77.8	-10.42
77.9	-10.63
78	-10.69
78.1	-10.82
78.2	-10.77
78.3	-10.68
78.3	-10.68
78.4	-10.8
78.5	-10.82
78.6	-10.84
78.7	-10.57
78.8	-10.69
80.6	-10.85
82.5	-10.75
84.3	-9.15
84.4	-9.03
84.4	-9
84.4	-9.07
84.5	-9.03
84.5	-8.95
84.5	-8.87
84.6	-8.85
84.6	-8.85
84.6	-8.76
84.6	-8.87
84.7	-8.84
84.7	-8.83
84.7	-8.74
84.8	-8.72
84.8	-8.75
84.83	-8.86
84.86	-8.74
84.89	-8.75
84.92	-8.92
84.95	-8.95
84.98	-8.85
85.01	-8.82
85.04	-8.83
85.07	-8.83
85.1	-8.89
85.13	-8.86
85.16	-8.79
85.19	-8.76
85.22	-8.7
85.25	-8.65
85.28	-8.7
85.31	-8.76
85.34	-8.6
85.37	-8.6
85.4	-8.61
85.43	-8.57
85.46	-8.56
85.49	-8.46
85.52	-8.42
85.55	-8.55
85.58	-8.62
85.61	-8.54
85.67	-8.37
85.7	-8.42
85.73	-8.42
86.01	-8.38
86.3	-8.27
86.58	-8.25
86.87	-8.23
87.15	-9.1
87.44	-9.97
87.72	-10.18
88.01	-9.92
88.13	-9.84
88.25	-9.84
88.37	-10.02
88.49	-9.92
88.62	-9.98
88.74	-10.14
88.86	-10.12
88.98	-10
89.1	-9.89
89.22	-9.71
89.34	-9.75
89.47	-9.56
89.59	-9.56
89.71	-9.7
89.83	-9.6
89.95	-9.84
90.07	-9.76
90.19	-9.7
90.31	-9.43
90.44	-9.2
90.56	-9.01
90.68	-8.89
90.8	-8.59
90.92	-8.53
91.04	-8.44
91.16	-8.52
91.28	-8.53
91.35	-8.56
91.41	-8.57
91.47	-8.48
91.53	-8.39
91.59	-8.4
91.66	-8.41
91.72	-8.47
91.84	-8.47
91.9	-8.33
91.97	-8.43
92	-8.52
92.1	-8.51
92.2	-8.55
92.2	-8.34
92.4	-8.42
92.6	-8.56
92.7	-8.47
92.9	-8.59
93.1	-8.6
93.3	-8.39
93.5	-8.52
93.6	-8.55
93.8	-8.09
94	-8.32
94.1	-8.4
94.1	-8.24
94.2	-8.32
94.2	-8.13
94.3	-8.16
94.4	-8.21
94.4	-8.24
94.5	-8.35
94.5	-8.34
94.6	-8.38
94.66	-8.52
94.72	-8.44
94.78	-8.39
94.84	-8.42
94.9	-8.36
96.1	-8.59
97.4	-8.91
98.59	-9.41
99	-9.4
99.1	-9.35
99.2	-9.47
99.4	-9.56
99.5	-9.22
99.6	-9.53
99.8	-10.24
99.9	-10.57
100	-11.02
100.2	-10.87
100.3	-10.67
100.4	-11.01
100.6	-10.89
100.7	-11.27
100.9	-11.16
101	-11.11
101.1	-11.06
101.3	-11.14
101.4	-11.25
101.6	-11.16
101.7	-11.22
101.8	-11.43
102	-11.2
102.1	-11.34
102.3	-11.13
102.4	-11.33
102.5	-11.16
102.7	-11.39
102.8	-11.4
103	-11.11
103.1	-11.18
103.2	-11.16
103.4	-11.06
103.5	-11.32
103.7	-11.03
103.8	-11
103.9	-10.98
104.1	-10.62
104.2	-10.82
104.4	-10.75
104.5	-10.58
104.6	-10.06
104.8	-10.25
104.9	-9.97
105.1	-10.01
105.2	-9.97
105.3	-10.13
105.5	-10.15
105.6	-10.19
105.7	-10.37
105.8	-10.77
106	-10.92
106.1	-11
106.2	-11.14
106.3	-11.1
106.4	-11.36
106.5	-11.33
106.6	-11.59
106.8	-11.41
106.9	-11.55
107	-11.63
107.1	-11.68
107.2	-11.68
107.3	-11.67
107.5	-11.86
107.6	-11.69
107.7	-11.78
107.8	-11.59
107.9	-11.53
108	-11.49
108.1	-11.66
108.3	-11.28
108.4	-11.5
108.5	-10.89
108.6	-10.59
108.7	-11.34
109	-11.41
109	-11.05
109.1	-11.21
109.2	-10.75
109.3	-10.71
109.4	-10.44
109.5	-10.71
109.6	-10.26
109.7	-10.11
109.7	-9.78
109.8	-9.58
109.9	-9.25
110	-8.97
110.1	-8.37
110.2	-8.7
110.3	-8.34
110.4	-8.52
110.4	-8.56
110.5	-8.68
110.6	-8.34
110.7	-8.63
110.8	-8.38
110.9	-8.64
111	-8.46
111.1	-8.82
111.2	-8.69
111.3	-8.7
111.4	-8.6
111.5	-8.95
111.6	-9.12
111.7	-9.27
111.8	-9.42
111.9	-8.85
112	-8.95
112.1	-8.87
112.2	-8.8
112.3	-9.06
112.4	-8.98
112.6	-8.87
112.7	-8.81
112.8	-8.84
112.9	-8.98
113	-8.76
113.1	-8.54
113.2	-8.54
113.3	-8.51
113.4	-8.53
113.5	-8.18
113.6	-8.41
113.8	-8.2
113.9	-7.76
114	-7.76
114.2	-7.72
114.3	-7.61
114.4	-7.68
114.6	-7.66
114.7	-7.58
114.8	-7.62
115	-7.38
115.1	-7.82
115.2	-7.18
115.4	-7.47
115.5	-7.25
115.6	-7.36
115.8	-7.15
115.9	-7.47
116.1	-7.09
116.2	-7.12
116.3	-7.34
116.5	-7.42
116.6	-7.22
116.7	-7.41
116.9	-7.51
117	-7.02
117.2	-7.32
117.4	-7.37
117.5	-7.45
117.7	-7.51
117.8	-7.61
118	-7.68
118.2	-7.6
118.3	-7.71
118.5	-8.14
118.7	-8.26
118.8	-8.19
119	-8.23
119.1	-8.16
119.3	-8.32
119.5	-8.64
119.6	-8.19
119.7	-8.68
119.9	-8.47
120	-8.47
120.2	-8.39
120.4	-8.69
120.5	-8.82
120.6	-8.76
120.8	-8.99
120.9	-8.93
121	-9.06
121.1	-8.98
121.3	-9.22
121.4	-9.31
121.5	-9.24
121.7	-9.31
121.7	-9.3
121.7	-9.31
121.7	-9.45
121.7	-9.52
121.7	-9.43
121.7	-9.51
121.7	-9.91
121.7	-9.88
121.8	-10.07
121.8	-9.74
121.8	-9.76
121.8	-9.97
121.8	-10.12
121.8	-9.93
121.8	-10.32
121.8	-10.16
121.8	-10.11
121.9	-10.14
121.9	-10.18
121.9	-10.12
121.9	-10.09
121.9	-10.29
121.9	-10.31
121.9	-10.31
121.9	-10.49
121.9	-10.46
122	-10.49
122	-10.41
122	-10.37
122	-10.35
122	-10.35
122	-10.44
122	-10.23
122	-10.35
122	-10.4
122	-10.36
122.1	-10.27
122.1	-10.41
122.1	-10.5
122.1	-10.44
122.1	-10.54
122.1	-10.49
122.2	-10.54
122.2	-10.39
122.2	-10.48
122.2	-10.45
122.2	-10.39
122.2	-10.19
122.2	-10.34
122.2	-10.47
122.3	-10.36
122.3	-10.46
122.4	-10.48
122.4	-10.43
122.5	-10.42
122.5	-10.44
122.6	-10.22
122.6	-10.45
122.7	-10.5
122.7	-10.42
122.8	-10.66
122.8	-10.62
122.9	-10.5
122.9	-10.4
123	-10.38
123	-10.39
123.1	-10.54
123.1	-10.59
123.2	-10.55
123.2	-10.57
123.3	-10.43
123.3	-10.27
123.4	-10.5
123.4	-10.51
123.5	-10.63
123.5	-10.87
123.6	-10.79
123.6	-10.33
123.7	-10.7
123.7	-10.52
123.8	-10.57
123.8	-10.57
123.9	-10.35
123.9	-10.51
124	-10.41
124	-10.35
124.1	-10.26
124.1	-10.3
124.2	-10.67
124.2	-10.46
124.3	-10.19
124.3	-10.36
124.4	-10.73
124.4	-10.34
124.5	-10.4
124.6	-10.49
124.7	-10.29
124.7	-10.42
124.8	-10.51
124.9	-10.31
125	-10.45
125.1	-10.61
125.2	-10.29
125.2	-10.53
125.3	-10.6
125.4	-10.8
125.5	-10.65
125.6	-10.79
125.7	-10.79
125.7	-10.78
125.8	-10.39
125.9	-10.58
126	-10.66
126.1	-10.45
126.3	-10.62
126.3	-10.57
126.4	-10.84
126.4	-10.97
126.5	-10.49
126.5	-10.53
126.6	-10.68
126.6	-10.49
126.7	-10.6
126.8	-10.43
126.9	-10.42
126.9	-10.48
127	-10.2
127	-10.11
127.1	-10.33
127.1	-10.16
127.2	-10.16
127.2	-10.44
127.3	-10.45
127.4	-9.89
127.5	-9.99
127.6	-9.97
127.7	-9.94
127.8	-9.93
127.9	-10.02
128	-9.98
128.1	-9.67
128.2	-10.07
128.3	-9.6
128.4	-9.68
128.5	-9.69
128.6	-9.61
128.7	-9.55
128.8	-9.4
128.9	-9.31
129	-9.41
129.1	-9.29
129.2	-9.35
129.3	-9.15
129.4	-9.06
129.5	-8.98
129.6	-8.7
129.6	-8.65
129.6	-8.44
129.6	-8.17
129.6	-8.14
129.7	-7.76
129.7	-7.33
129.7	-7.17
129.7	-7.47
129.8	-7.07
129.8	-6.85
129.8	-6.92
129.8	-6.69
129.9	-6.42
129.9	-6.47
129.9	-6.62
129.9	-6.6
129.9	-6.47
130	-6.07
130	-6.9
130	-6.76
130.1	-6.6
130.1	-6.73
130.1	-6.51
130.2	-6.52
130.2	-6.14
130.3	-6.31
130.3	-6.18
130.3	-6
130.4	-6.05
130.4	-6.06
130.4	-5.94
130.5	-6.02
130.5	-6
130.6	-5.83
130.6	-6.09
130.6	-6.03
130.7	-6.03
130.7	-6.15
130.7	-5.9
130.8	-5.99
130.8	-5.93
130.9	-5.92
130.9	-5.94
130.9	-5.79
131	-5.67
131	-5.7
131	-5.69
131.1	-5.68
131.3	-5.91
131.4	-5.77
131.5	-5.86
131.6	-5.68
131.7	-5.81
131.8	-5.9
132	-5.87
132.1	-5.82
132.2	-5.91
132.3	-6.19
132.4	-6.13
132.5	-6.17
132.6	-6.19
132.7	-6.07
132.8	-6.28
132.9	-6.29
133.1	-6.3
133.2	-6.47
133.3	-6.14
133.4	-6.48
133.5	-6.25
133.6	-6.54
133.7	-6.69
133.8	-6.68
133.9	-6.72
134	-6.68
134.2	-6.19
134.3	-6.09
134.4	-5.86
134.5	-5.96
134.6	-6.12
134.7	-6.21
134.8	-6.07
134.9	-6.06
135	-6.18
135.1	-6.41
135.3	-6.22
135.4	-6.31
135.5	-6.29
135.6	-6.22
135.7	-6.28
135.8	-6.6
135.9	-6.72
136	-6.99
136.1	-7.22
136.2	-7.23
136.3	-7.18
136.4	-8.04
136.5	-7.71
136.6	-7.87
136.6	-7.87
136.7	-7.94
136.8	-7.85
136.9	-7.67
136.9	-7.92
137	-7.81
137.1	-7.63
137.2	-7.61
137.2	-7.71
137.3	-7.78
137.4	-7.61
137.5	-7.71
137.5	-7.56
137.6	-7.74
137.7	-7.57
137.8	-7.76
137.8	-7.55
137.9	-7.62
138	-7.29
138.1	-7.33
138.1	-7.66
138.2	-7.52
138.3	-7.4
138.4	-7.37
138.4	-7.43
138.5	-7.42
138.6	-7.17
138.7	-7.14
138.7	-7.48
138.8	-7.45
138.9	-7.36
138.9	-7
138.9	-6.94
138.9	-6.6
138.9	-6.67
138.9	-7.04
138.9	-6.94
138.9	-7.24
138.9	-7.26
138.9	-7.63
139	-7.75
139	-8.13
139	-8
139	-7.92
139	-8.05
139	-8.14
139	-8
139	-8.14
139	-8.21
139	-8.14
139	-8.1
139	-8.18
139	-7.86
139	-8.05
139	-8.28
139	-8.3
139	-8.07
139.1	-8.04
139.1	-7.9
139.1	-7.94
139.2	-8.44
139.3	-8.2
139.4	-8.28
139.4	-8.33
139.5	-8.15
139.6	-8.51
139.7	-8.14
139.8	-8.31
139.8	-8.36
139.9	-8.5
140	-8.25
140.1	-8.41
140.1	-8.39
140.2	-8.37
140.3	-8.41
140.4	-8.56
140.4	-8.51
140.5	-8.55
140.6	-8.8
140.7	-8.77
140.8	-8.62
140.8	-8.76
140.9	-8.75
141	-8.82
141.1	-8.45
141.1	-8.25
141.2	-8.64
141.3	-8.66
141.4	-8.97
141.5	-9.13
141.5	-9.29
141.6	-9.26
141.7	-9.21
141.8	-9.18
141.8	-8.99
141.9	-8.76
142	-8.91
142.1	-9.09
142.1	-9.13
142.2	-9.22
142.3	-9.12
142.4	-9.15
142.5	-9.28
142.5	-9.15
142.6	-9.5
142.7	-9.09
142.8	-9.31
142.8	-9.14
142.9	-9.16
143	-9.06
143.1	-9.07
143.1	-9.12
143.2	-9.4
143.3	-9.41
143.4	-9.53
143.5	-9.34
143.5	-9.38
143.6	-8.6
143.7	-8.61
143.8	-8.99
143.8	-9.15
143.9	-9.54
144	-9.35
144.1	-9.22
144.1	-9.42
144.2	-9.41
144.3	-9.47
144.4	-9.36
144.5	-9.49
144.5	-9.61
144.6	-9.53
144.7	-9.69
144.8	-9.82
144.8	-9.75
144.9	-9.93
145	-9.73
145.1	-9.73
145.1	-9.59
145.2	-9.57
145.3	-9.36
145.4	-9.45
145.5	-9.26
145.5	-9.59
145.6	-9.36
145.7	-9.38
145.8	-9.5
145.8	-9.5
145.9	-9.51
146	-9.67
146.1	-9.59
146.2	-9.54
146.2	-9.57
146.3	-9.63
146.4	-9.61
146.5	-9.68
146.5	-9.56
146.6	-9.81
146.7	-9.74
146.8	-9.82
146.8	-9.78
146.9	-10.1
147	-9.85
147.1	-10.13
147.2	-10.12
147.2	-10.27
147.3	-10.43
147.4	-10.78
147.5	-10.55
147.5	-10.08
147.6	-9.93
147.7	-9.64
147.8	-9.55
147.8	-9.79
147.9	-9.62
148	-9.67
148.1	-9.54
148.2	-9.56
148.2	-9.46
148.3	-9.75
148.4	-9.8
148.5	-9.95
148.5	-9.29
148.6	-10.21
148.7	-9.65
148.8	-10.15
148.8	-9.95
148.9	-9.65
149	-9.88
149.1	-9.34
149.2	-8.92
149.2	-9.06
149.3	-8.62
149.4	-9.03
149.5	-8.75
149.5	-9.23
149.6	-8.69
149.7	-9.2
149.8	-8.73
149.9	-9.54
149.9	-9.2
150	-9.33
150.1	-9.18
150.2	-9.48
150.2	-8.94
150.3	-9.14
150.4	-9.02
150.5	-9.13
150.5	-8.87
150.6	-9.13
150.7	-8.74
150.8	-9.2
150.9	-8.92
150.9	-9
151	-9.13
151.1	-9.32
151.2	-9.24
151.2	-9.37
151.3	-9.88
151.4	-9.76
151.5	-9.17
151.5	-9.65
151.6	-8.7
151.7	-9.4
151.8	-8.42
151.9	-9.4
151.9	-8.76
152	-9.04
152.1	-8.82
152.2	-9.2
152.2	-8.98
152.3	-8.9
152.4	-8.81
152.5	-9.12
152.6	-8.68
152.7	-8.79
152.8	-8.81
152.9	-8.85
153	-8.87
153.1	-9.05
153.2	-8.67
153.3	-9
153.4	-8.82
153.5	-8.93
153.7	-8.73
153.8	-8.87
153.9	-8.74
154	-8.94
154.1	-8.74
154.2	-8.93
154.3	-8.61
154.4	-8.68
154.5	-8.78
154.6	-8.7
154.7	-8.96
154.8	-8.87
154.9	-9.08
155.1	-9.11
155.2	-8.94
155.3	-8.96
155.4	-8.72
155.5	-8.74
155.6	-8.88
155.7	-8.82
155.8	-8.71
155.9	-8.89
156	-9.04
156.1	-8.94
156.2	-9.15
156.3	-9.07
156.5	-9.17
156.6	-9.23
156.7	-9.32
156.8	-9.33
156.9	-9.18
157	-9.19
157.1	-8.61
157.2	-8.81
157.3	-8.86
157.4	-8.51
157.5	-8.77
157.6	-8.35
157.7	-8.81
157.9	-8.92
158	-8.35
158.1	-8.33
158.2	-8.05
158.3	-7.94
158.4	-8.19
158.5	-7.97
158.6	-8.69
158.7	-7.92
158.8	-8.7
158.9	-8.62
159	-8.96
159.2	-9.01
159.3	-8.85
159.4	-9.02
159.5	-9.03
159.6	-9.13
159.7	-8.86
159.8	-9
159.9	-8.95
160	-9.08
160.1	-9.01
160.2	-8.94
160.3	-8.82
160.4	-8.71
160.6	-7.55
160.7	-7.6
160.8	-6.18
160.9	-6.09
161	-6.32
161.1	-6.51
161.3	-6.51
161.5	-6.68
161.7	-6.46
161.9	-6.76
162.1	-8.09
162.3	-8.68
162.5	-8.54
162.7	-8.5
162.9	-8.52
163.1	-8.35
163.3	-8.46
163.5	-8.08
163.7	-8.27
163.9	-7.61
164.1	-7.91
164.3	-7.04
164.5	-6.79
164.7	-6.47
164.9	-6.89
165	-8.07
165.1	-8.27
165.2	-9.11
165.4	-9.22
165.5	-9.62
165.6	-10.06
165.7	-9.91
165.9	-10.2
166	-10.18
166.1	-10.21
166.2	-10.29
166.4	-10.33
166.5	-9.55
166.6	-10.34
166.7	-10.03
166.9	-10.51
167	-10.98
167.1	-11.02
167.2	-10.89
167.4	-10.84
167.5	-11.11
167.6	-11.02
167.7	-11.16
167.7	-11.11
167.8	-11.11
167.9	-11.07
168	-11.24
168.1	-10.98
168.1	-10.99
168.2	-10.67
168.3	-11.03
168.4	-10.72
168.5	-10.67
168.5	-10.51
168.6	-10.59
168.7	-10.62
168.8	-10.5
168.9	-10.32
168.9	-10.59
169	-10.51
169.1	-10.4
169.2	-10.26
169.3	-10.35
169.4	-10.18
169.4	-10.09
169.5	-10.34
169.6	-9.64
169.7	-9.94
169.8	-9.58
169.8	-9.52
169.9	-9.62
170	-9.56
170.1	-9.71
170.2	-9.67
170.2	-10.35
170.3	-10.15
170.4	-10.46
170.5	-10.49
170.6	-10.12
170.7	-10.51
170.7	-10.24
170.8	-10.28
170.9	-10.48
171	-10.01
171.1	-10.98
171.1	-10.4
171.2	-11.4
171.3	-10.63
171.4	-11.48
171.5	-10.89
171.5	-11.3
[truncated: 1,317 more rows]
