# Supplementary material for: Multiscale monsoon variability during the last two climatic cycles revealed by spectral signals in Chinese loess and speleothem records
Source: Copernicus journal article supplement (doi:10.5194/cp-11-1067-2015), 2015-08-25
Supplement: Supplementary file 2 [file supplementary Table. 1.xlsx]

## Sheet: Sheet1
age (kyr)	mean(µm)
2.7	19.795
3.75	18.41
4.8	18.568
5.85	17.435
6.9	19.445
7.95	21.99
9	19.45
10.05	20.924
11.1	23.463
12.15	23.542
13.2	23.759
13.47	27.285
13.75	26.313
13.9978	29.74
14.2294	31.812
14.4732	30.222
14.7155	30.406
14.9262	34.963
15.1442	33.798
15.3634	33.612
15.5792	34.147
15.7804	36.611
16.0183	30.978
16.2429	32.802
16.4284	39.714
16.6261	37.266
16.8023	41.824
16.9987	37.512
17.226	32.416
17.4007	42.162
17.6091	35.355
17.8329	32.925
18.0164	40.149
18.2054	38.983
18.4069	36.571
18.6097	36.337
18.8121	36.388
19.0067	37.869
19.1808	42.307
19.3849	36.11
19.5971	34.72
19.8192	33.173
20.0066	39.313
20.2381	31.824
20.4354	37.341
20.6184	40.279
20.8293	34.921
21.0251	37.637
21.2282	36.271
21.4476	33.594
21.6787	31.875
21.9159	31.058
22.1382	33.141
22.3651	32.481
22.5957	31.942
22.8659	27.27
23.1136	29.753
23.3122	37.099
23.4987	39.488
23.7174	33.699
23.9723	28.905
24.2043	31.754
24.4037	36.95
24.5963	38.26
24.8534	28.653
25.0946	30.55
25.3197	32.734
25.551	31.845
25.7491	37.204
25.9528	36.169
26.2119	28.432
26.4324	33.41
26.6623	32.052
26.9049	30.37
27.1118	35.62
27.3111	36.96
27.5436	31.698
27.7507	35.571
28.0024	29.265
28.2671	27.841
28.5	31.633
28.7431	30.706
28.9822	31.212
29.2155	31.992
29.4349	34.017
29.7023	27.905
29.9555	29.478
30.2047	29.949
30.4784	27.268
30.7329	29.319
31.0087	27.065
31.306	25.101
31.529	33.465
31.778	29.982
32.0548	26.957
32.3197	28.178
32.5561	31.568
32.8082	29.608
33.0486	31.046
33.2973	30.007
33.5476	29.811
33.8001	29.556
34.0643	28.25
34.3387	27.196
34.6135	27.159
34.8924	26.76
35.1458	29.459
35.3813	31.692
35.634	29.536
35.9091	27.124
36.1833	27.221
36.4705	25.984
36.7487	26.832
37.0183	27.678
37.2794	28.587
37.5137	31.855
37.742	32.689
37.9924	29.799
38.2244	32.176
38.473	30.022
38.7	32.874
38.9326	33.479
39.1807	31.386
39.4529	28.611
39.7217	28.968
39.9811	30.01
40.2208	32.488
40.4919	28.723
40.7584	29.221
41.0224	29.496
41.2826	29.927
41.5429	29.918
41.8333	26.81
42.1082	28.329
42.3557	31.454
42.5951	32.532
42.8542	30.056
43.0852	33.707
43.3713	27.218
43.6458	28.368
43.9099	29.484
44.194	27.409
44.4325	32.654
44.6519	35.48
44.906	30.651
45.1464	32.391
45.393	31.576
45.636	32.047
45.91	28.412
46.1521	32.168
46.4103	30.164
46.7142	25.622
46.9888	28.356
47.273	27.401
47.5902	24.543
47.8273	32.841
48.0862	30.085
48.3412	30.532
48.581	32.472
48.8427	29.755
49.1	30.265
49.3049	32.64
49.5109	32.473
49.728	30.815
49.9358	32.203
50.1485	31.441
50.3859	28.177
50.6155	29.132
50.8601	27.353
51.1189	25.847
51.3512	28.801
51.6006	26.822
51.8664	25.164
52.1105	27.407
52.392	23.758
52.6712	23.964
52.9346	25.392
53.2074	24.521
53.4917	23.536
53.7585	25.069
54.0252	25.084
54.2861	25.638
54.5012	31.096
54.7432	27.643
55.001	25.948
55.2294	29.291
55.496	25.09
55.7698	24.433
56.0044	28.518
56.2272	30.021
56.4615	28.545
56.6927	28.941
56.9225	29.102
57.1894	25.067
57.4442	26.255
57.6959	26.572
57.9843	23.2
58.2373	26.44
58.4931	26.151
58.7478	26.26
59	26.525
59.1773	33.276
59.3639	31.634
59.5681	28.892
59.7481	32.793
59.9312	32.216
60.1364	28.761
60.3216	31.861
60.5099	31.343
60.7097	29.532
60.9008	30.878
61.1013	29.439
61.309	28.41
61.4775	35.019
61.669	30.801
61.859	31.073
62.0522	30.544
62.2533	29.331
62.4516	29.767
62.629	33.261
62.7948	35.599
62.9821	31.489
63.1667	31.97
63.3441	33.274
63.5457	29.262
63.7077	36.43
63.8966	31.239
64.0538	37.543
64.2392	31.827
64.4183	32.944
64.6098	30.818
64.8006	30.921
64.9849	32.029
65.1504	35.658
65.3306	32.743
65.5001	34.808
65.7017	29.276
65.872	34.641
66.0455	34.007
66.2237	33.13
66.3909	35.29
66.5708	32.805
66.7413	34.595
66.9095	35.098
67.0718	36.346
67.2364	35.861
67.421	31.966
67.5925	34.395
67.7756	32.239
67.9233	39.949
68.0894	35.529
68.2585	34.887
68.4266	35.104
68.5804	38.382
68.7421	36.488
68.912	34.723
69.0715	36.994
69.2419	34.635
69.4152	34.056
69.5995	32.019
69.773	34.009
69.9623	31.175
70.1661	28.944
70.3648	29.704
70.5258	36.643
70.686	36.854
70.8494	36.114
71.0231	33.971
71.2006	33.237
71.3619	36.596
71.5384	33.433
71.6967	37.269
71.8736	33.347
72.0318	37.305
72.1924	36.757
72.3654	34.106
72.5371	34.359
72.6952	37.329
72.8618	35.418
73.0446	32.286
73.1962	38.915
73.3641	35.162
73.5295	35.665
73.743	27.646
73.9769	25.223
74.2115	25.15
74.4369	26.189
74.6262	31.158
74.8169	30.955
75.0077	30.93
75.2011	30.501
75.3982	29.947
75.5892	30.893
75.7906	29.299
76	28.18
76.4148	27.548
76.8358	27.139
77.2505	27.557
77.6625	27.73
78.0869	26.924
78.5303	25.776
79.0543	21.803
79.603	20.826
80.153	20.775
80.6979	20.972
81.2425	20.98
81.7739	21.503
82.329	20.586
82.9361	18.821
83.4858	20.785
84.0227	21.285
84.5344	22.332
85.0581	21.816
85.5482	23.318
86.0141	24.525
86.4709	25.011
86.8994	26.667
87.354	25.138
87.8256	24.229
88.2763	25.351
88.7424	24.516
89.2096	24.458
89.6769	24.454
90.1507	24.117
90.5914	25.929
91.0308	26
91.471	25.962
91.8748	28.299
92.3024	26.721
92.7249	27.041
93.1595	26.296
93.5866	26.754
94.0701	23.631
94.5356	24.55
95.0242	23.383
95.5625	21.228
96.0293	24.481
96.5064	23.949
96.967	24.808
97.4192	25.271
97.8571	26.089
98.3016	25.712
98.7179	27.444
99.1341	27.455
99.5535	27.243
99.9928	26.013
100.407	27.564
100.832	26.901
101.288	25.083
101.762	24.113
102.221	24.876
102.694	24.158
103.175	23.755
103.694	22.007
104.22	21.712
104.77	20.8
105.302	21.464
105.854	20.692
106.42	20.197
107.004	19.568
107.542	21.251
108.029	23.461
108.53	22.806
109.032	22.773
109.56	21.62
110.063	22.737
110.581	22.026
111.151	20.072
111.703	20.683
112.174	24.247
112.619	25.726
113.038	27.26
113.446	28.007
113.859	27.624
114.24	30.06
114.654	27.589
115.078	26.922
115.507	26.642
115.919	27.711
116.367	25.543
116.816	25.433
117.279	24.668
117.73	25.371
118.199	24.348
118.674	24.075
119.169	23.081
119.638	24.34
120.143	22.618
120.698	20.603
121.21	22.304
121.728	22.084
122.274	20.917
122.845	20.02
123.459	18.594
124.091	18.086
124.752	17.287
125.327	19.878
125.914	19.475
126.477	20.287
126.944	24.481
127.336	29.103
127.741	28.233
128.13	29.395
128.532	28.367
128.882	32.69
129.241	31.79
129.613	30.745
130	29.53
130.43	33.285
130.844	34.499
131.279	32.884
131.716	32.769
132.128	34.689
132.582	31.551
133.007	33.6
133.417	34.965
133.865	31.895
134.343	29.907
134.76	34.345
135.19	33.263
135.657	30.636
136.073	34.354
136.488	34.476
136.909	33.963
137.307	35.974
137.767	31.123
138.191	33.697
138.602	34.81
139.027	33.692
139.444	34.225
139.889	32.159
140.319	33.265
140.764	32.185
141.182	34.219
141.585	35.48
142.015	33.231
142.445	33.27
142.877	33.155
143.348	30.332
143.771	33.83
144.215	32.245
144.64	33.659
145.032	36.484
145.446	34.582
145.843	35.968
146.214	38.556
146.628	34.574
147.005	37.901
147.418	34.684
147.85	33.092
148.241	36.562
148.608	39.054
149.025	34.247
149.43	35.383
149.853	33.816
150.279	33.562
150.677	35.933
151.049	38.426
151.406	40.108
151.809	35.486
152.122	45.763
152.488	39.057
152.852	39.305
153.158	46.65
153.557	35.845
154.016	31.212
154.443	33.484
154.791	41.147
155.139	41.094
155.526	36.932
155.905	37.787
156.277	38.451
156.673	36.121
157.044	38.471
157.434	36.676
157.824	36.749
158.225	35.628
158.635	34.869
159.088	31.589
159.553	30.763
159.96	35.154
160.427	30.668
160.872	32.105
161.283	34.786
161.736	31.597
162.19	31.518
162.623	33.046
163.092	30.507
163.538	32.092
164.024	29.401
164.463	32.56
165	26.657
165.413	25.275
165.803	26.826
166.214	25.433
166.638	24.658
167.062	24.616
167.476	25.284
167.861	27.133
168.257	26.369
168.672	25.185
169.094	24.776
169.509	25.194
169.937	24.395
170.38	23.599
170.791	25.402
171.225	24.117
171.66	24.025
172.091	24.222
172.519	24.433
172.921	26.016
173.343	24.767
173.738	26.399
174.159	24.849
174.61	23.15
175.031	24.843
175.435	25.877
175.827	26.662
176.223	26.397
176.607	27.195
176.995	26.946
177.4	25.781
177.821	24.846
178.219	26.244
178.65	24.255
178.992	30.606
179.309	32.896
179.642	31.38
179.946	34.433
180.239	35.628
180.549	33.744
180.827	37.573
181.109	37.092
181.423	33.288
181.782	29.082
182.136	29.545
182.528	26.624
182.951	24.743
183.327	27.775
183.634	34.045
183.965	31.582
184.292	31.937
184.655	28.76
184.994	30.845
185.32	32.111
185.653	31.316
185.986	31.391
186.332	30.232
186.677	30.274
187.002	32.135
187.338	31.17
187.722	27.163
188.071	29.963
188.456	27.175
188.827	28.149
189.212	27.122
189.557	30.35
190	23.572
190.542	24.644
191.166	21.439
191.834	19.986
192.5	20.095
193.135	21.042
193.78	20.707
194.375	22.485
194.983	21.963
195.618	21.045
196.263	20.721
196.952	19.414
197.709	17.642
198.418	18.848
199.176	17.646
199.915	18.074
200.618	19.012
201.268	20.577
201.877	21.93
202.465	22.737
203.058	22.542
203.637	23.056
204.21	23.353
204.796	22.796
205.411	21.717
206.02	21.953
206.616	22.42
207.268	20.498
207.858	22.658
208.45	22.597
209.057	21.997
209.74	19.575
210.421	19.636
211.182	17.554
211.881	19.122
212.446	23.636
212.979	25.083
213.517	24.853
214.043	25.401
214.618	23.264
215.173	24.053
215.727	24.142
216.258	25.147
216.786	25.321
217.351	23.684
217.868	25.822
218.375	26.359
218.843	28.566
219.405	23.781
219.864	29.141
220.326	28.893
220.81	27.637
221.317	26.37
221.841	25.512
222.321	27.842
222.834	26.009
223.295	29.024
223.794	26.763
224.249	29.366
224.697	29.833
225.13	30.867
225.623	27.148
226.107	27.588
226.571	28.795
227.062	27.22
227.496	30.835
227.849	37.871
228.293	30.087
228.683	34.248
229.09	32.844
229.504	32.288
229.896	34.089
230.251	37.686
230.66	32.626
231.044	34.796
231.519	28.156
231.959	30.394
232.431	28.308
232.959	25.324
233.455	26.957
233.974	25.705
234.526	24.232
235.072	24.485
235.635	23.729
236.197	23.797
236.795	22.344
237.399	22.137
238.095	19.199
238.851	17.682
239.601	17.822
240.259	20.306
240.87	21.865
241.447	23.159
241.961	26.008
242.5	24.782
243.003	26.611
243.527	25.476
244	28.264
244.192	31.625
244.377	32.766
244.562	32.924
244.764	29.988
244.965	30.289
245.178	28.436
245.372	31.292
245.582	28.959
245.811	26.55
246.015	29.674
246.21	31.171
246.405	31.168
246.642	25.665
246.888	24.649
247.133	24.818
247.356	27.233
247.586	26.325
247.761	34.832
247.928	36.221
248.15	27.415
248.422	22.339
248.685	23.052
248.892	29.323
249.089	30.843
249.298	29.009
249.514	28.125
249.725	28.843
249.954	26.482
250.195	25.215
250.416	27.419
250.648	26.184
250.868	27.635
251.093	27.01
251.309	28.103
251.536	26.704
251.77	25.947
252.007	25.641
252.245	25.507
252.462	28.001
252.693	26.258
252.943	24.329
253.181	25.509
253.424	24.951
253.655	26.35
253.85	31.026
254.059	29.144
254.278	27.657
254.488	28.957
254.69	30.04
254.918	26.686
255.121	29.862
255.336	28.259
255.561	26.914
255.792	26.357
256.012	27.574
256.219	29.271
256.42	30.288
256.628	29.219
256.83	29.987
257.046	28.148
257.244	30.653
257.459	28.225
257.667	29.257
257.873	29.491
258.096	27.132
258.318	27.453
258.521	29.838
258.735	28.353
258.939	29.766
259.129	32.036
259.337	29.165
259.539	30.002
259.752	28.623
259.975	27.175
260.188	28.477
75.9	28.7144
76	28.18
76.1	28.0276
76.2	27.8753
76.3	27.7229
76.4	27.5705
76.5	27.4652
76.6	27.3681
76.7	27.2709
76.8	27.1738
76.9	27.2037
77	27.3045
77.1	27.4053
77.2	27.5061
77.3	27.5778
77.4	27.6198
77.5	27.6618
77.6	27.7037
77.7	27.6589
77.8	27.469
77.9	27.279
78	27.0891
78.1	26.8902
78.2	26.6312
78.3	26.3723
78.4	26.1133
78.5	25.8543
78.6	25.2473
78.7	24.4892
78.8	23.7311
78.9	22.973
79	22.2149
79.1	21.7217
79.2	21.5436
79.3	21.3655
79.4	21.1875
79.5	21.0094
79.6	20.8314
79.7	20.817
79.8	20.8077
79.9	20.7985
80	20.7892
80.1	20.7799
80.2	20.792
80.3	20.8281
80.4	20.8643
80.5	20.9005
80.6	20.9366
80.7	20.972
80.8	20.9735
80.9	20.975
81	20.9764
81.1	20.9779
81.2	20.9794
81.3	21.0366
81.4	21.135
81.5	21.2334
81.6	21.3318
81.7	21.4303
81.8	21.4599
81.9	21.2947
82	21.1295
82.1	20.9643
82.2	20.7991
82.3	20.6339
82.4	20.3795
82.5	20.0888
82.6	19.7981
82.7	19.5074
82.8	19.2167
82.9	18.9259
83	19.0493
83.1	19.4065
83.2	19.7638
83.3	20.1211
83.4	20.4783
83.5	20.7982
83.6	20.8913
83.7	20.9845
83.8	21.0776
83.9	21.1707
84	21.2639
84.1	21.4432
84.2	21.6478
84.3	21.8525
84.4	22.0571
84.5	22.2617
84.6	22.2673
84.7	22.1688
84.8	22.0703
84.9	21.9718
85	21.8733
85.1	21.9444
85.2	22.2509
85.3	22.5574
85.4	22.8639
85.5	23.1704
85.6	23.4523
85.7	23.7114
85.8	23.9704
85.9	24.2295
86	24.4885
86.1	24.6164
86.2	24.7228
86.3	24.8292
86.4	24.9355
86.5	25.1233
86.6	25.5098
86.7	25.8963
86.8	26.2827
86.9	26.6651
87	26.3287
87.1	25.9923
87.2	25.656
87.3	25.3196
87.4	25.0493
87.5	24.8566
87.6	24.6638
87.7	24.4711
87.8	24.2783
87.9	24.4142
88	24.6631
88.1	24.9121
88.2	25.161
88.3	25.3086
88.4	25.1294
88.5	24.9503
88.6	24.7711
88.7	24.592
88.8	24.5088
88.9	24.4964
89	24.484
89.1	24.4716
89.2	24.4592
89.3	24.4572
89.4	24.4564
89.5	24.4555
89.6	24.4547
89.7	24.4376
89.8	24.3664
89.9	24.2953
90	24.2242
90.1	24.153
90.2	24.3198
90.3	24.731
90.4	25.1422
90.5	25.5533
90.6	25.9304
90.7	25.9465
90.8	25.9627
90.9	25.9789
91	25.995
91.1	25.994
91.2	25.9854
91.3	25.9768
91.4	25.9681
91.5	26.13
91.6	26.7088
91.7	27.2875
91.8	27.8663
91.9	28.2059
92	27.8368
92.1	27.4678
92.2	27.0988
92.3	26.7298
92.4	26.7949
92.5	26.8707
92.6	26.9464
92.7	27.0221
92.8	26.9123
92.9	26.7409
93	26.5694
93.1	26.398
93.2	26.3394
93.3	26.4467
93.4	26.5539
93.5	26.6611
93.6	26.6674
93.7	26.0215
93.8	25.3756
93.9	24.7298
94	24.0839
94.1	23.69
94.2	23.8874
94.3	24.0849
94.4	24.2823
94.5	24.4798
94.6	24.3961
94.7	24.1573
94.8	23.9185
94.9	23.6797
95	23.4409
95.1	23.0797
95.2	22.6793
95.3	22.279
95.4	21.8787
95.5	21.4783
95.6	21.4892
95.7	22.1862
95.8	22.8831
95.9	23.58
96	24.277
96.1	24.4021
96.2	24.2906
96.3	24.1791
96.4	24.0676
96.5	23.9561
96.6	24.1236
96.7	24.3101
96.8	24.4966
96.9	24.6831
97	24.8418
97.1	24.9442
97.2	25.0466
97.3	25.149
97.4	25.2514
97.5	25.422
97.6	25.6088
97.7	25.7955
97.8	25.9823
97.9	26.0526
98	25.9678
98.1	25.883
98.2	25.7981
98.3	25.7133
98.4	26.1215
98.5	26.5375
98.6	26.9535
98.7	27.3695
98.8	27.4462
98.9	27.4488
99	27.4515
99.1	27.4541
99.2	27.4217
99.3	27.3712
99.4	27.3206
99.5	27.2701
99.6	27.1129
99.7	26.8329
99.8	26.5529
99.9	26.2729
100	26.0399
100.1	26.4141
100.2	26.7882
100.3	27.1624
100.4	27.5365
100.5	27.4194
100.6	27.2633
100.7	27.1072
100.8	26.9511
100.9	26.6301
101	26.231
101.1	25.8319
101.2	25.4328
101.3	25.0577
101.4	24.8531
101.5	24.6484
101.6	24.4437
101.7	24.239
101.8	24.1769
101.9	24.343
102	24.5091
102.1	24.6752
102.2	24.8413
102.3	24.7559
102.4	24.6041
102.5	24.4523
102.6	24.3005
102.7	24.1529
102.8	24.0691
102.9	23.9853
103	23.9015
103.1	23.8178
103.2	23.6705
103.3	23.3338
103.4	22.9972
103.5	22.6605
103.6	22.3239
103.7	22.0037
103.8	21.9476
103.9	21.8916
104	21.8355
104.1	21.7795
104.2	21.7234
104.3	21.5799
104.4	21.4139
104.5	21.2478
104.6	21.0818
104.7	20.9158
104.8	20.8377
104.9	20.9625
105	21.0872
105.1	21.2119
105.2	21.3366
105.3	21.4614
105.4	21.3272
105.5	21.1874
105.6	21.0476
105.7	20.9078
105.8	20.768
105.9	20.652
106	20.5646
106.1	20.4771
106.2	20.3896
106.3	20.3021
106.4	20.2146
106.5	20.1109
106.6	20.0032
106.7	19.8955
106.8	19.7878
106.9	19.6801
107	19.5724
107.1	19.8683
107.2	20.1813
107.3	20.4944
107.4	20.8073
107.5	21.1203
107.6	21.5154
107.7	21.9691
107.8	22.4229
107.9	22.8766
108	23.3304
108.1	23.3679
108.2	23.2372
108.3	23.1064
108.4	22.9757
108.5	22.845
108.6	22.8014
108.7	22.7948
108.8	22.7882
108.9	22.7816
109	22.7751
109.1	22.6237
109.2	22.4056
109.3	22.1874
109.4	21.9693
109.5	21.7511
109.6	21.7087
109.7	21.9309
109.8	22.1532
109.9	22.3755
110	22.5977
110.1	22.6858
110.2	22.5488
110.3	22.4117
110.4	22.2747
110.5	22.1376
110.6	21.9623
110.7	21.619
110.8	21.2758
110.9	20.9325
111	20.5893
111.1	20.2461
111.2	20.1265
111.3	20.2371
111.4	20.3477
111.5	20.4583
111.6	20.5689
111.7	20.6795
111.8	21.4153
111.9	22.1715
112	22.9278
112.1	23.6841
112.2	24.3321
112.3	24.6651
112.4	24.9981
112.5	25.3311
112.6	25.6641
112.7	26.0239
112.8	26.3898
112.9	26.7558
113	27.1218
113.1	27.3739
113.2	27.557
113.3	27.7401
113.4	27.9232
113.5	27.9568
113.6	27.8642
113.7	27.7716
113.8	27.679
113.9	27.8841
114	28.525
114.1	29.1658
114.2	29.8066
114.3	29.6993
114.4	29.1027
114.5	28.506
114.6	27.9094
114.7	27.5162
114.8	27.3591
114.9	27.202
115	27.0448
115.1	26.9077
115.2	26.8424
115.3	26.7772
115.4	26.7119
115.5	26.6466
115.6	26.883
115.7	27.1423
115.8	27.4015
115.9	27.6608
116	27.3203
116.1	26.8357
116.2	26.351
116.3	25.8664
116.4	25.5348
116.5	25.5104
116.6	25.4859
116.7	25.4614
116.8	25.4369
116.9	25.2943
117	25.1291
117.1	24.964
117.2	24.7989
117.3	24.7004
117.4	24.8565
117.5	25.0126
117.6	25.1687
117.7	25.3248
117.8	25.2176
117.9	24.9996
118	24.7816
118.1	24.5636
118.2	24.3474
118.3	24.2899
118.4	24.2323
118.5	24.1748
118.6	24.1173
118.7	24.0219
118.8	23.8211
118.9	23.6203
119	23.4195
119.1	23.2187
119.2	23.1652
119.3	23.4334
119.4	23.7016
119.5	23.9698
119.6	24.2379
119.7	24.1289
119.8	23.788
119.9	23.4472
120	23.1063
120.1	22.7655
120.2	22.4119
120.3	22.0485
120.4	21.6852
120.5	21.3219
120.6	20.9586
120.7	20.6101
120.8	20.9421
120.9	21.2741
121	21.6062
121.1	21.9382
121.2	22.2702
121.3	22.2658
121.4	22.2233
121.5	22.1808
121.6	22.1382
121.7	22.0957
121.8	21.9293
121.9	21.7157
122	21.5021
122.1	21.2884
122.2	21.0748
122.3	20.8759
122.4	20.7188
122.5	20.5616
122.6	20.4045
122.7	20.2473
122.8	20.0902
122.9	19.8915
123	19.6595
123.1	19.4274
123.2	19.1954
123.3	18.9633
123.4	18.7313
123.5	18.5612
123.6	18.4808
123.7	18.4003
123.8	18.3199
123.9	18.2395
124	18.1591
124.1	18.0751
124.2	17.9542
124.3	17.8333
124.4	17.7124
124.5	17.5916
124.6	17.4707
124.7	17.3498
124.8	17.5036
124.9	17.9543
125	18.405
125.1	18.8558
125.2	19.3065
125.3	19.7572
125.4	19.8277
125.5	19.759
125.6	19.6903
125.7	19.6217
125.8	19.553
125.9	19.4843
126	19.5997
126.1	19.7438
126.2	19.888
126.3	20.0322
126.4	20.1763
126.5	20.4958
126.6	21.3943
126.7	22.2929
126.8	23.1914
126.9	24.09
127	25.1459
127.1	26.3231
127.2	27.5003
127.3	28.6775
127.4	28.9657
127.5	28.7508
127.6	28.5358
127.7	28.3209
127.8	28.4097
127.9	28.7087
128	29.0076
128.1	29.3065
128.2	29.2153
128.3	28.9601
128.4	28.7049
128.5	28.4497
128.6	29.2029
128.7	30.4397
128.8	31.6764
128.9	32.6448
129	32.3944
129.1	32.144
129.2	31.8937
129.3	31.6252
129.4	31.344
129.5	31.0629
129.6	30.7817
129.7	30.472
129.8	30.158
129.9	29.844
130	29.53
130.1	30.4037
130.2	31.2775
130.3	32.1512
130.4	33.025
130.5	33.4907
130.6	33.7834
130.7	34.0762
130.8	34.369
130.9	34.2926
131	33.9213
131.1	33.55
131.2	33.1788
131.3	32.8786
131.4	32.8522
131.5	32.8259
131.6	32.7995
131.7	32.7732
131.8	33.1604
131.9	33.626
132	34.0916
132.1	34.5573
132.2	34.1927
132.3	33.5006
132.4	32.8085
132.5	32.1163
132.6	31.6392
132.7	32.1205
132.8	32.6018
132.9	33.0831
133	33.5643
133.1	33.9089
133.2	34.2426
133.3	34.5762
133.4	34.9099
133.5	34.3936
133.6	33.7091
133.7	33.0245
133.8	32.34
133.9	31.7496
134	31.334
134.1	30.9183
134.2	30.5027
134.3	30.087
134.4	30.511
134.5	31.5766
134.6	32.6421
134.7	33.7077
134.8	34.2439
134.9	33.9923
135	33.7407
135.1	33.4891
135.2	33.206
135.3	32.6433
135.4	32.0807
135.5	31.5181
135.6	30.9555
135.7	31.0219
135.8	31.9148
135.9	32.8077
136	33.7007
136.1	34.3619
136.2	34.3913
136.3	34.4207
136.4	34.4501
136.5	34.4615
136.6	34.3397
136.7	34.2179
136.8	34.0961
136.9	33.9743
137	34.4219
137.1	34.9276
137.2	35.4333
137.3	35.9391
137.4	34.9914
137.5	33.936
137.6	32.8805
137.7	31.8251
137.8	31.326
137.9	31.9324
138	32.5387
138.1	33.1451
138.2	33.7213
138.3	33.9922
138.4	34.263
138.5	34.5339
138.6	34.8047
138.7	34.5518
138.8	34.2885
138.9	34.0252
139	33.7619
139.1	33.7857
139.2	33.9132
139.3	34.0407
139.4	34.1683
139.5	33.9672
139.6	33.5027
139.7	33.0382
139.8	32.5737
139.9	32.1865
140	32.4437
140.1	32.7009
140.2	32.9581
140.3	33.2153
140.4	33.0689
140.5	32.8259
140.6	32.5829
140.7	32.34
140.8	32.3613
140.9	32.8479
141	33.3344
141.1	33.821
141.2	34.2759
141.3	34.5887
141.4	34.9015
141.5	35.2142
141.6	35.4015
141.7	34.879
141.8	34.3565
141.9	33.8341
142	33.3116
142.1	33.2387
142.2	33.2477
142.3	33.2568
142.4	33.2659
142.5	33.2554
142.6	33.2288
142.7	33.2021
142.8	33.1755
142.9	33.0163
143	32.4177
143.1	31.8191
143.2	31.2205
143.3	30.6219
143.4	30.7586
143.5	31.5859
143.6	32.4131
143.7	33.2404
143.8	33.7274
143.9	33.3701
144	33.0128
144.1	32.6555
144.2	32.2982
144.3	32.5282
144.4	32.8609
144.5	33.1936
144.6	33.5263
144.7	34.0922
144.8	34.8127
144.9	35.5332
145	36.2537
145.1	36.1711
145.2	35.7113
145.3	35.2515
145.4	34.7917
145.5	34.7716
145.6	35.1201
145.7	35.4686
145.8	35.8171
145.9	36.3635
146	37.061
146.1	37.7586
146.2	38.4562
146.3	37.7313
146.4	36.7689
146.5	35.8064
146.6	34.844
146.7	35.2082
146.8	36.0897
146.9	36.9712
147	37.8528
147.1	37.1637
147.2	36.3837
147.3	35.6036
147.4	34.8236
147.5	34.3816
147.6	34.0133
147.7	33.645
147.8	33.2768
147.9	33.534
148	34.4209
148.1	35.3078
148.2	36.1947
148.3	36.9606
148.4	37.641
148.5	38.3213
148.6	39.0017
148.7	37.9916
148.8	36.8408
148.9	35.6899
149	34.5391
149.1	34.4567
149.2	34.7377
149.3	35.0187
149.4	35.2997
149.5	35.1224
149.6	34.752
149.7	34.3815
149.8	34.0111
149.9	33.7878
150	33.7282
150.1	33.6686
150.2	33.609
150.3	33.6878
150.4	34.2834
150.5	34.879
150.6	35.4746
150.7	36.0872
150.8	36.7569
150.9	37.4266
151	38.0963
151.1	38.6654
151.2	39.137
151.3	39.6086
151.4	40.0802
151.5	39.0289
151.6	37.8823
151.7	36.7357
151.8	35.5891
151.9	38.478
152	41.7658
152.1	45.0536
152.2	44.3271
152.3	42.4961
152.4	40.6651
152.5	39.0653
152.6	39.1334
152.7	39.2016
152.8	39.2697
152.9	40.4604
153	42.8558
153.1	45.2511
153.2	45.5237
153.3	42.8161
153.4	40.1086
153.5	37.401
153.6	35.4151
153.7	34.4042
153.8	33.3933
153.9	32.3824
154	31.3715
154.1	31.6599
154.2	32.1918
154.3	32.7236
154.4	33.2554
154.5	34.7408
154.6	36.9451
154.7	39.1493
154.8	41.1456
154.9	41.1303
155	41.1151
155.1	41.0999
155.2	40.4355
155.3	39.361
155.4	38.2864
155.5	37.2119
155.6	37.099
155.7	37.3249
155.8	37.5508
155.9	37.7766
156	37.9573
156.1	38.1358
156.2	38.3142
156.3	38.3135
156.4	37.7251
156.5	37.1368
156.6	36.5484
156.7	36.2939
156.8	36.9259
156.9	37.5579
157	38.1899
157.1	38.2154
157.2	37.7552
157.3	37.295
157.4	36.8348
157.5	36.6883
157.6	36.707
157.7	36.7258
157.8	36.7445
157.9	36.5361
158	36.2569
158.1	35.9777
158.2	35.6985
158.3	35.4897
158.4	35.3047
158.5	35.1197
158.6	34.9347
158.7	34.4017
158.8	33.6774
158.9	32.9531
159	32.2287
159.1	31.5683
159.2	31.3906
159.3	31.213
159.4	31.0354
159.5	30.8577
159.6	31.2667
159.7	32.3458
159.8	33.425
159.9	34.504
160	34.7715
160.1	33.8097
160.2	32.848
160.3	31.8862
160.4	30.9245
160.5	30.9045
160.6	31.227
160.7	31.5496
160.8	31.8721
160.9	32.2861
161	32.9381
161.1	33.59
161.2	34.242
161.3	34.6693
161.4	33.9649
161.5	33.2605
161.6	32.5561
161.7	31.8517
161.8	31.5859
161.9	31.5685
162	31.5511
162.1	31.5337
162.2	31.5532
162.3	31.9062
162.4	32.2592
162.5	32.6122
162.6	32.9652
162.7	32.6284
162.8	32.0869
162.9	31.5455
163	31.004
163.1	30.5362
163.2	30.8918
163.3	31.2474
163.4	31.603
163.5	31.9586
163.6	31.7464
163.7	31.1933
163.8	30.6402
163.9	30.0871
164	29.534
164.1	29.9471
164.2	30.6661
164.3	31.3852
164.4	32.1043
164.5	32.1572
164.6	31.0572
164.7	29.9571
164.8	28.8571
164.9	27.757
165	26.657
165.1	26.3228
165.2	25.9885
165.3	25.6543
165.4	25.3201
165.5	25.6195
165.6	26.0176
165.7	26.4157
165.8	26.8138
165.9	26.4974
166	26.1583
166.1	25.8193
166.2	25.4803
166.3	25.2757
166.4	25.0928
166.5	24.91
166.6	24.7271
166.7	24.6518
166.8	24.642
166.9	24.6321
167	24.6222
167.1	24.6769
167.2	24.8385
167.3	25.0001
167.4	25.1617
167.5	25.4008
167.6	25.8808
167.7	26.3609
167.8	26.8409
167.9	27.0575
168	26.8647
168.1	26.672
168.2	26.4792
168.3	26.2468
168.4	25.9614
168.5	25.6761
168.6	25.3908
168.7	25.158
168.8	25.061
168.9	24.964
169	24.8671
169.1	24.7821
169.2	24.8829
169.3	24.9837
169.4	25.0844
169.5	25.1852
169.6	25.0238
169.7	24.8373
169.8	24.6508
169.9	24.4643
170	24.282
170.1	24.1023
170.2	23.9225
170.3	23.7428
170.4	23.6867
170.5	24.125
170.6	24.5632
170.7	25.0015
170.8	25.3765
170.9	25.0799
171	24.7834
171.1	24.4869
171.2	24.1903
171.3	24.1011
171.4	24.0799
171.5	24.0588
171.6	24.0376
171.7	24.0434
171.8	24.0891
171.9	24.1347
172	24.1804
172.1	24.2264
172.2	24.2757
172.3	24.325
172.4	24.3743
172.5	24.4237
172.6	24.7526
172.7	25.1467
172.8	25.5407
172.9	25.9348
173	25.781
173.1	25.485
173.2	25.189
173.3	24.893
173.4	25.0038
173.5	25.416
173.6	25.8283
173.7	26.2405
173.8	26.1721
173.9	25.8036
174	25.435
174.1	25.0665
174.2	24.6947
174.3	24.3184
174.4	23.942
174.5	23.5657
174.6	23.1893
174.7	23.5104
174.8	23.9129
174.9	24.3153
175	24.7178
175.1	25.0194
175.2	25.2754
175.3	25.5314
175.4	25.7874
175.5	26.0072
175.6	26.2075
175.7	26.4078
175.8	26.608
175.9	26.6131
176	26.5462
176.1	26.4792
176.2	26.4123
176.3	26.5572
176.4	26.7649
176.5	26.9725
176.6	27.1802
176.7	27.1354
176.8	27.0712
176.9	27.007
177	26.9316
177.1	26.6442
177.2	26.3568
177.3	26.0694
177.4	25.782
177.5	25.5595
177.6	25.3372
177.7	25.1149
177.8	24.8926
177.9	25.1235
178	25.4745
178.1	25.8256
178.2	26.1767
178.3	25.8709
178.4	25.4093
178.5	24.9476
178.6	24.486
178.7	25.1841
178.8	27.0441
178.9	28.9041
179	30.6672
179.1	31.3881
179.2	32.1089
179.3	32.8297
179.4	32.4826
179.5	32.0274
179.6	31.5722
179.7	31.9611
179.8	32.967
179.9	33.9729
180	34.654
180.1	35.0615
180.2	35.4688
180.3	35.2573
180.4	34.649
180.5	34.0407
180.6	34.4492
180.7	35.8258
180.8	37.2024
180.9	37.4482
181	37.2775
181.1	37.1068
181.2	35.9854
181.3	34.7737
181.4	33.562
181.5	32.3823
181.6	31.2118
181.7	30.0414
181.8	29.1056
181.9	29.2365
182	29.3674
182.1	29.4983
182.2	29.0664
182.3	28.3223
182.4	27.5782
182.5	26.834
182.6	26.3043
182.7	25.859
182.8	25.4137
182.9	24.9683
183	25.1411
183.1	25.947
183.2	26.7528
183.3	27.5586
183.4	29.269
183.5	31.3116
183.6	33.3542
183.7	33.5524
183.8	32.8081
183.9	32.0638
184	31.6203
184.1	31.7288
184.2	31.8372
184.3	31.8667
184.4	30.9924
184.5	30.1181
184.6	29.2438
184.7	29.0349
184.8	29.6502
184.9	30.2656
185	30.8678
185.1	31.2568
185.2	31.6457
185.3	32.0347
185.4	31.9195
185.5	31.6812
185.6	31.443
185.7	31.3265
185.8	31.349
185.9	31.3716
186	31.3449
186.1	31.0096
186.2	30.6743
186.3	30.339
186.4	30.2403
186.5	30.2524
186.6	30.2646
186.7	30.4049
186.8	30.9771
186.9	31.5494
187	32.1216
187.1	31.8539
187.2	31.5661
187.3	31.2783
187.4	30.5204
187.5	29.4789
187.6	28.4374
187.7	27.3959
187.8	27.7862
187.9	28.589
188	29.3918
188.1	29.7539
188.2	29.0289
188.3	28.3039
188.4	27.579
188.5	27.2912
188.6	27.5535
188.7	27.8159
188.8	28.0782
188.9	27.9544
189	27.6879
189.1	27.4213
189.2	27.1548
189.3	27.9441
189.4	28.8815
189.5	29.819
189.6	29.6872
189.7	28.1584
189.8	26.6296
189.9	25.1008
190	23.572
190.1	23.7697
190.2	23.9673
190.3	24.165
190.4	24.3627
190.5	24.5603
190.6	24.3475
190.7	23.8334
190.8	23.3193
190.9	22.8051
191	22.291
191.1	21.7769
191.2	21.3645
191.3	21.1472
191.4	20.93
191.5	20.7127
191.6	20.4954
191.7	20.2781
191.8	20.0608
191.9	19.9967
192	20.0131
192.1	20.0295
192.2	20.0459
192.3	20.0623
192.4	20.0787
192.5	20.0957
192.6	20.2448
192.7	20.3939
192.8	20.543
192.9	20.6921
193	20.8412
193.1	20.9903
193.2	21.0081
193.3	20.9562
193.4	20.9043
193.5	20.8524
193.6	20.8005
193.7	20.7486
193.8	20.7664
193.9	21.0655
194	21.3647
194.1	21.6638
194.2	21.9629
194.3	22.262
194.4	22.4632
194.5	22.3774
194.6	22.2916
194.7	22.2058
194.8	22.12
194.9	22.0343
195	21.9385
195.1	21.794
195.2	21.6494
195.3	21.5049
195.4	21.3603
195.5	21.2158
195.6	21.0712
195.7	21.0039
195.8	20.9536
195.9	20.9034
196	20.8532
196.1	20.8029
196.2	20.7527
196.3	20.651
196.4	20.4612
196.5	20.2713
196.6	20.0815
196.7	19.8916
196.8	19.7018
196.9	19.5119
197	19.3007
197.1	19.0668
197.2	18.8329
197.3	18.599
197.4	18.3651
197.5	18.1312
197.6	17.8973
197.7	17.6634
197.8	17.7965
197.9	17.9666
198	18.1367
198.1	18.3068
198.2	18.4768
198.3	18.6469
198.4	18.817
198.5	18.7182
198.6	18.5595
198.7	18.4008
198.8	18.2421
198.9	18.0834
199	17.9247
199.1	17.766
199.2	17.6601
199.3	17.718
199.4	17.7759
199.5	17.8337
199.6	17.8916
199.7	17.9495
199.8	18.0074
199.9	18.0653
200	18.1873
200.1	18.3207
200.2	18.4541
200.3	18.5876
200.4	18.721
200.5	18.8544
200.6	18.9879
200.7	19.2094
200.8	19.4503
200.9	19.6913
201	19.9322
201.1	20.1732
201.2	20.4141
201.3	20.6489
201.4	20.871
201.5	21.093
201.6	21.315
201.7	21.537
201.8	21.759
201.9	21.9615
202	22.0988
202.1	22.2361
202.2	22.3734
202.3	22.5107
202.4	22.648
202.5	22.7254
202.6	22.6926
202.7	22.6597
[truncated: 573 more rows]
